# Supplementary material for: Trap induced tunable unusual dielectric properties in transition metal doped reduced graphene oxide
Source: Royal Society of Chemistry journal article supplement (doi:10.1039/c4ra13387k), 2015-01-01
Supplement: c4ra13387k1.pdf [file c4ra13387k1.pdf]

## SUPPLEMENTARY INFORMATION

### **Trap induced tunable unusual dielectric properties in transition metal doped reduced graphene oxide**

**Abu Jahid Akhtar, Abhisek Gupta and Shyamal K. Saha\***

Department of Materials Science

Indian Association for the Cultivation of Science, Jadavpur,

Kolkata 700032, India

E-mail: cnsks@iacs.res.in

In order to check the stability of the Ni-RGO\_6h sample (almost 8 weeks after synthesis) at 85°C in 75-85% relative humidity range, we have performed Raman spectrum of the composite as shown in Figure S1.

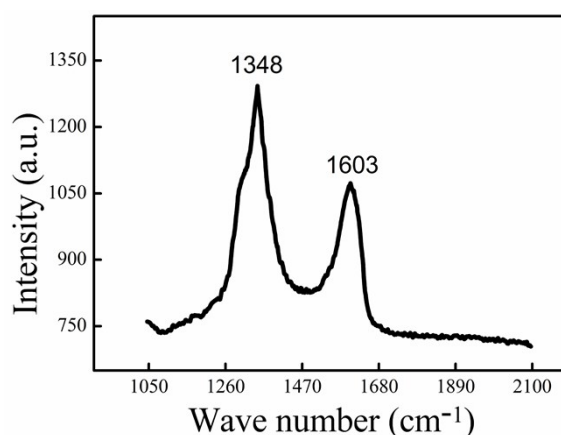

**Figure S1** Raman spectra of Ni-RGO\_6h sample (almost 8 weeks after synthesis) at 85°C in 75-85% relative humidity range.

From the spectra, it has been observed that, the position of D and G bands as well as the  $I_D/I_G$  ratio are quiet similar to the freshly prepared sample. This confirms the stability of the sample even after 8 weeks.

We have performed the dielectric permittivity as a function of frequency for cobalt atom doped reduced graphene oxide at room temperature as shown in Figure S2.

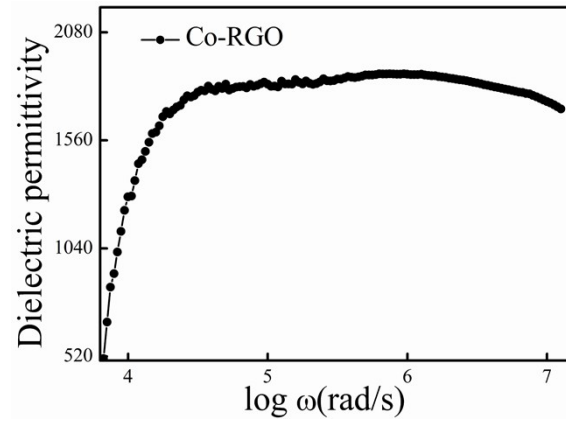

**Figure S2** Variation of dielectric permittivity with frequency for cobalt doped reduced graphene oxide sample at room temperature.
